# Supplementary material for: Acquired cancer cell resistance to T cell bispecific antibodies and CAR T targeting HER2 through JAK2 down-modulation
Source: PubMed Central journal article supplement (PMC7902842; doi:10.1038/s41467-021-21445-4), 2021-02-23
Supplement: 41467_2021_21445_MOESM1_ESM.pdf [file 41467_2021_21445_MOESM1_ESM.pdf]

## Supplementary information

### Acquired cancer cell resistance to T cell bispecific antibodies and CAR T targeting HER2 through JAK2 down-modulation

Enrique J. Arenas<sup>1, 2, #</sup>, Alex Martínez-Sabadell<sup>1, #</sup>, Irene Rius Ruiz<sup>1, 2</sup>, Macarena Román Alonso<sup>1</sup>, Marta Escorihuela<sup>1</sup>, Antonio Luque<sup>1</sup>, Carlos Alberto Fajardo<sup>3</sup>, Alena Gros<sup>3</sup>, Christian Klein<sup>4</sup>, Joaquín Arribas<sup>1, 2, 5, 6, 7</sup>

<sup>1</sup> Preclinical Research Program Vall d'Hebron Institute of Oncology (VHIO), Barcelona, 08035, Spain.

<sup>2</sup> Centro de Investigación Biomédica en Red de Cáncer, Monforte de Lemos, Madrid, 28029, Spain.

<sup>3</sup> Cancer Immunotherapy & Immunology CAIMI Program, VHIO, Barcelona, 08035, Spain.

<sup>4</sup> Roche Innovation Center Zurich, Roche Pharmaceutical Research and Early Development, Wagistrasse 18, 8952 Schlieren, Switzerland.

<sup>5</sup> Department of Biochemistry and Molecular Biology, Universitat Autònoma de Barcelona, Campus de la UAB, 08193, Bellaterra, Spain.

<sup>6</sup> Cancer Research Program, IMIM (Hospital del Mar Medical Research Institute), Barcelona, Spain.

<sup>7</sup> Institució Catalana de Recerca i Estudis Avançats (ICREA), 08010, Barcelona, Spain.

# These authors contributed equally

Corresponding Author:

Joaquín Arribas PhD

Vall d'Hebron Institute of Oncology (VHIO)

C/Natzaret, 115-117

Barcelona 08035, Spain

Phone: +34 93 274 6026

E-mail: jarribas@vhio.net

**Supplementary Fig. 1: Co-culture assays to determine the activity of TCBs and CARs, expression of HER2 in parental BT474 cells and BT-R resistant cells and sensitivity to different antitumor treatments.**

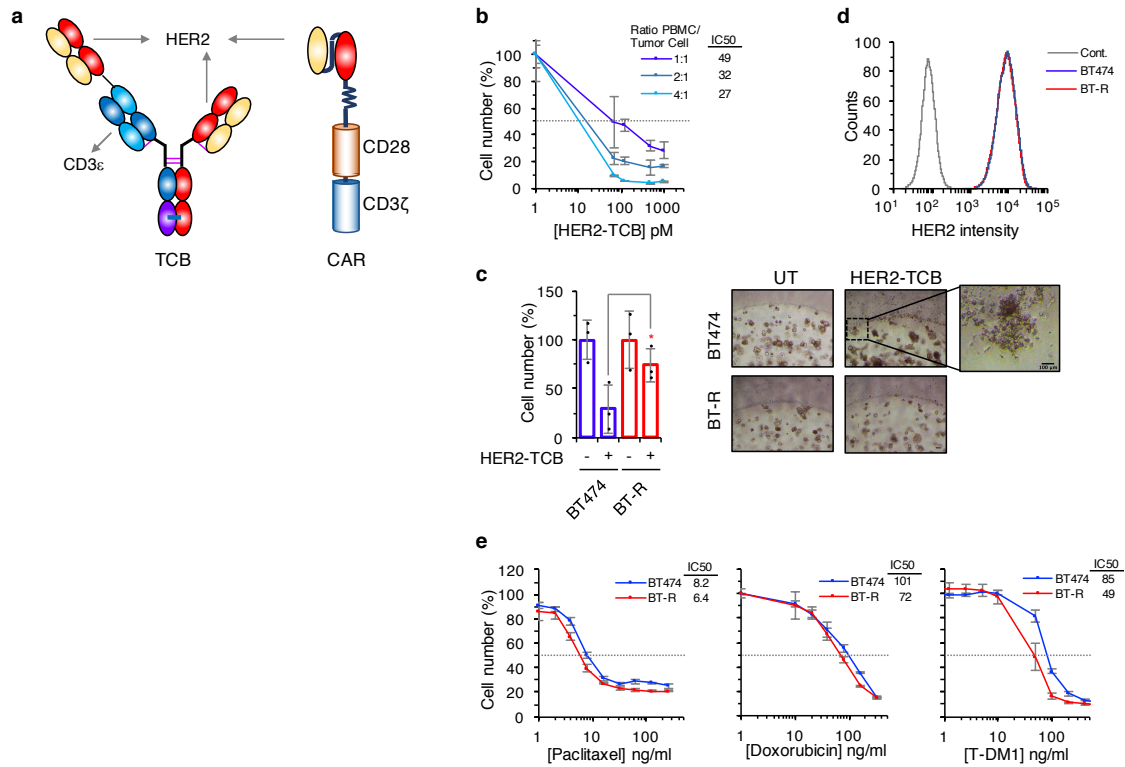

**a**, Schematic drawings of the HER2-TCB and HER2-CAR used in this study.

**b**, Co-cultures of PBMCs with BT474 cells at different ratios were treated with different concentrations of HER2-TCB for 72 h. Then, viable BT474 cells were quantified by flow cytometry using EpCAM as a marker.

**c**, Left, co-cultures of PBMCs with BT474 and resistant BT-R were grown in 3D and treated with 1 nM HER2-TCB for 72 h. Viable target cells were quantified as in **b** and normalized to untreated condition. \*p=0.04, two-tailed t test.

Right, representative microphotographs of the 3D cultures.

**d**, Cells were stained with anti-HER2 and analyzed by flow cytometry. As control BT474 cells were stained with an irrelevant primary antibody.

**e**, Parental BT474 or resistant BT-R cells were treated with different concentrations of the indicated drugs. Treatment lasted 72 h in the chemotherapies treatments and 6 days in the T-DM1 experiment. Then, viable cells were quantified by the crystal violet assay.

Data are presented as mean  $\pm$  SD of two (**b**) or three (**c**, **e**) independent experiments. Source data are provided as a Source Data file.



**Supplementary Fig. 2: Cytokines and growth factors secreted and status of lymphocyte activation in co-cultures of parental BT474 cells and BT-R resistant cells.**

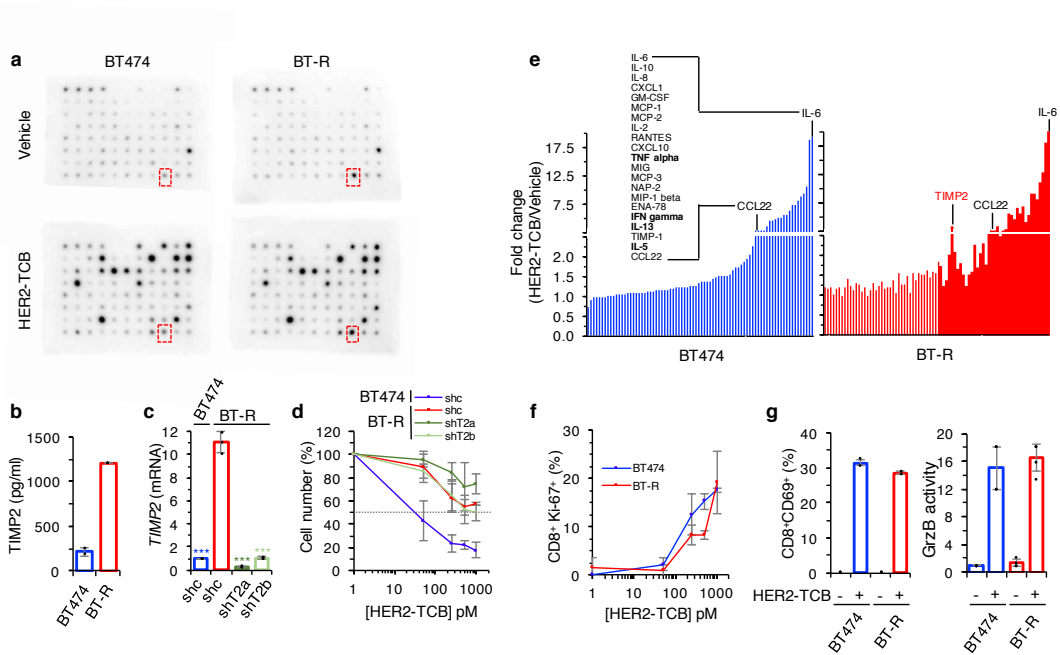

**a**, Analysis of a panel of cytokines and growth factors in the media conditioned by co-cultures of PBMCs with BT474 or BT-R cells treated with vehicle or HER2-TCB.

**b**, Expression of TIMP2 as determined by ELISA.

**c**, Expression of *TIMP2*, normalized to BT474, as determined by quantitative real-time PCR. \*\*\* $p < 0.001$ , two-tailed t test.

**d**, Co-cultures of PBMCs with the indicated cells were treated with different concentrations of HER2-TCB for 72 h. Then, viable target cells were quantified by flow cytometry using EpCAM as a marker.

**e**, Quantification of array showed in **a**. Data is shown as a fold change of co-cultures treated with HER2-TCB relative to co-cultures treated with vehicle. On the left and right, data on parental BT474 and BT-R, respectively.

**f**, The proliferation of lymphocytes was determined by Ki67 staining of CD8<sup>+</sup> cells in co-cultures treated with HER2-TCB for 72 h.

**g**, The percentage of CD8<sup>+</sup>CD69<sup>+</sup> lymphocytes or Granzyme B activity were determined in co-cultures of PBMCs with parental BT474 or BT-R cells treated with 67.5 pM of the HER2-TCB for 72 h. CD8<sup>+</sup>CD69<sup>+</sup> positivity was determined by flow cytometry. Granzyme B was measured by using the granzyme B substrate Ac-IEPD-pNA. Color reaction generated by the cleavage of the pNA substrate was measured. Results were normalized to untreated BT474 cells.

Data are presented as mean  $\pm$  SD of two (**b**, **f**, **g** left), three (**c**, **d**), or four (**g** right) independent experiments. Source data are provided as a Source Data file.

**Supplementary Fig. 3: IFN- $\gamma$  signaling in cells knock-down or KO for IFNGR1 and knock-down of JAK1 and STAT1.**

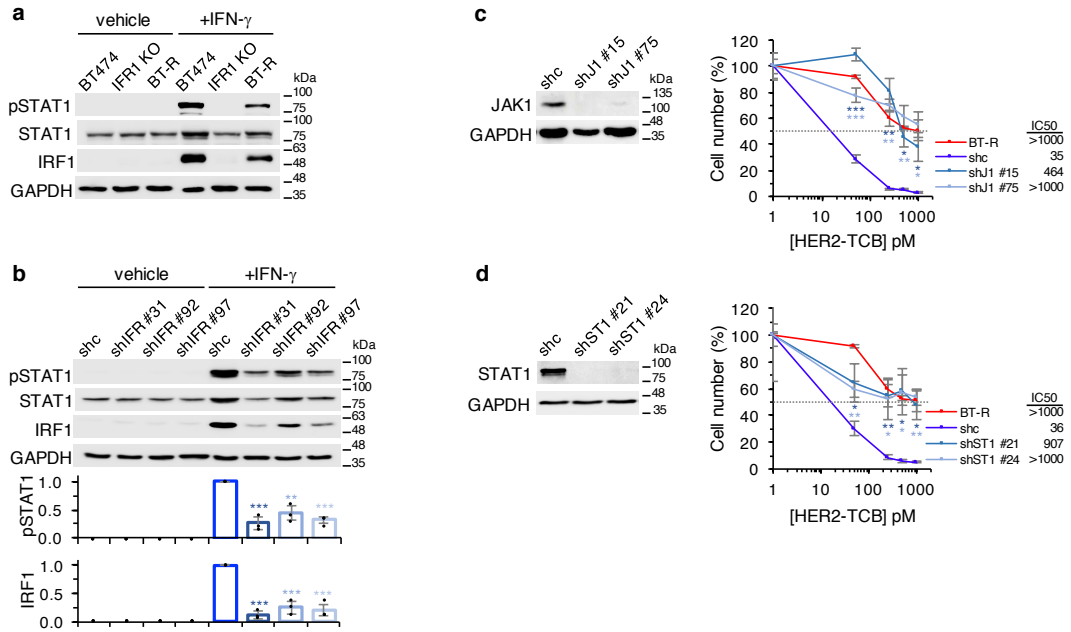

**a, b**, Western blot analysis of the expression of components of the IFN- $\gamma$  intracellular signaling pathway components. Results were normalized to treated BT474 cells. \*\* $p=0.03$ , \*\*\* $p<0.001$ , two-tailed t test.

**c, d**, Left, BT474 cells expressing control shRNA (shc) or shRNAs targeting JAK1 (shJ1) or STAT1 (shST1) were lysed and analyzed by Western blot with the indicated antibodies. Right, Co-cultures of PBMCs with BT-R cells or BT474 expressing the indicated shRNAs were treated with different concentrations of HER2-TCB for 72 h. Then, viable cells were quantified by flow cytometry using EpCAM as a marker. \*\*\* $p<0.001$ , \*\* $p=0.005$ , \* $p=0.01$ , \* $p=0.03$  (shJ1 #15), \*\*\* $p<0.001$ , \*\* $p=0.002$ , \*\* $p=0.009$ , \* $p=0.01$  (shJ1 #75); \* $p=0.03$ , \*\* $p=0.007$ , \* $p=0.01$ , \* $p=0.02$  (shST1 #21); \*\* $p=0.003$ , \* $p=0.04$ , \* $p=0.04$ , \*\* $p=0.0042$  (shST1 #24), two-tailed t test.

Data are presented as mean  $\pm$  SD of three independent experiments. Source data are provided as a Source Data file.

**Supplementary Fig.4: Role of IFN- $\gamma$  signaling in the response of different HER2-positive cancer models to HER2-TCB.**

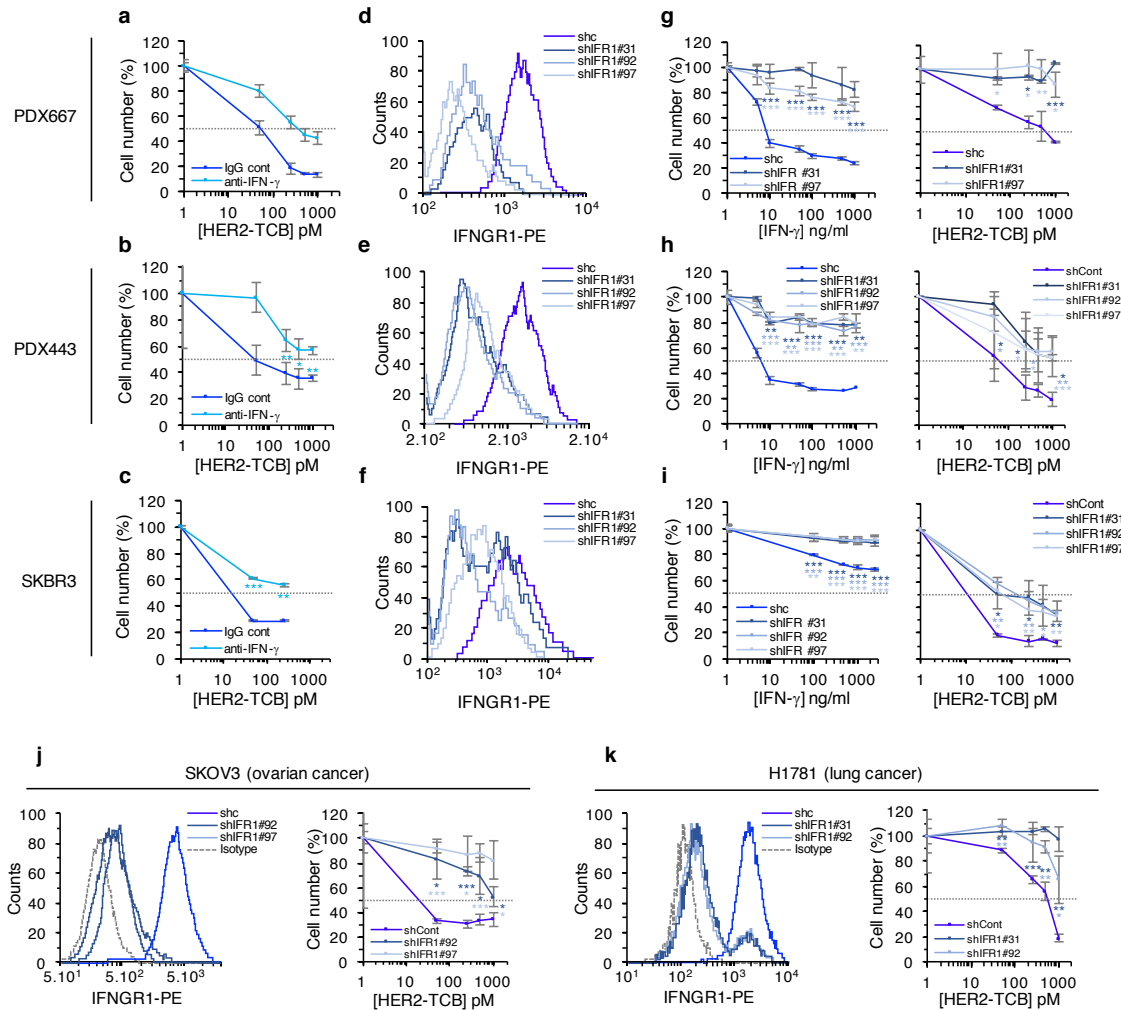

**a, b, c,** Co-cultures of PBMCs with the indicated breast cancer-derived cells were treated with different concentrations of HER2-TCB in presence of an IgG control or an IFN- $\gamma$  blocking antibody for 72 h. Then, viable target cells were quantified by flow cytometry using EpCAM as a marker. Results are expressed as averages  $\pm$  SD of two, four and three independent experiments, respectively.

**d, e, f,** Cells were stained with anti-IFN- $\gamma$  and analyzed by flow cytometry.

**g, h, i,** Left, the indicated cells were treated with different concentrations of IFN- $\gamma$  for 5 days. Cell numbers were estimated with the crystal violet staining assay. The results of three independent experiments are expressed as averages  $\pm$  SD.

Right, the indicated cells were treated with different concentrations of HER2-TCB and analyzed as in **a, b, c**.

**j, k,** Left, cells were analyzed as in **d, e, f**.

Right, cultures from the cell lines SKOV3 and H1781 derived from ovary and lung cancers respectively, were treated and analyzed as in **g, h, i**. Results are expressed as averages  $\pm$  SD of three independent experiments.

(b) \*\* $p=0.008$ , \* $p=0.018$ , \*\* $p=0.007$ . (c) \*\*\* $p<0.001$ , \*\* $p=0.002$ . (g) left, \*\*\* $p<0.001$ ; right, \* $p=0.04$ , \*\*\* $p<0.001$  (shIFN- $\gamma$  #31); \* $p=0.049$ , \* $p=0.013$ . \*\* $p=0.003$ , \* $p=0.012$  (shIFN- $\gamma$  #97). (h) left, \*\* $p=0.002$ , \*\*\* $p<0.001$ , \*\* $p=0.002$  (shIFN- $\gamma$  #31); \*\*\* $p<0.001$ , \*\* $p=0.002$ , \*\* $p=0.001$  (shIFN- $\gamma$  #92); \*\*\* $p<0.001$ , \*\* $p=0.007$  (shIFN- $\gamma$  #97); right, \* $p=0.02$ , \* $p=0.046$ , \* $p=0.01$  (shIFN- $\gamma$  #31); \* $p=0.04$ , \* $p=0.014$ , \*\* $p=0.003$  (shIFN- $\gamma$  #92); \* $p=0.02$ , \* $p=0.02$ , \*\*\* $p<0.001$  (shIFN- $\gamma$  #97). (i) left, \*\* $p=0.002$ , \*\*\* $p<0.001$ ; right, \* $p=0.04$ , \*\* $p=0.04$ , \*\* $p=0.005$  (shIFN- $\gamma$  #31); \*\* $p=0.004$ , \*\* $p=0.005$ , \* $p=0.02$  (shIFN- $\gamma$  #92); \* $p=0.012$ , \*\* $p=0.008$ , \* $p=0.013$ , \*\* $p=0.0014$  (shIFN- $\gamma$  #97). (j) \* $p=0.03$ , \*\*\* $p<0.001$ , \* $p=0.04$ , \* $p=0.04$  (shIFN- $\gamma$  #92); \*\*\* $p<0.001$ , \* $p=0.02$ , \* $p=0.02$  (shIFN- $\gamma$  #97). (k) \*\* $p=0.005$ , \*\*\* $p<0.001$ , \*\* $p=0.004$ , \*\* $p=0.002$  (shIFN- $\gamma$  #31); \*\* $p=0.008$ , \*\* $p=0.007$ , \* $p=0.046$  (shIFN- $\gamma$  #92). Two-tailed t test. Source data are provided as a Source Data file.

**Supplementary Fig. 5: Resistance stability of BT-R cells and IFN- $\gamma$  signaling in BT-R, BT474 or BT-RG cells engineered to gain or silence the expression of JAK2.**

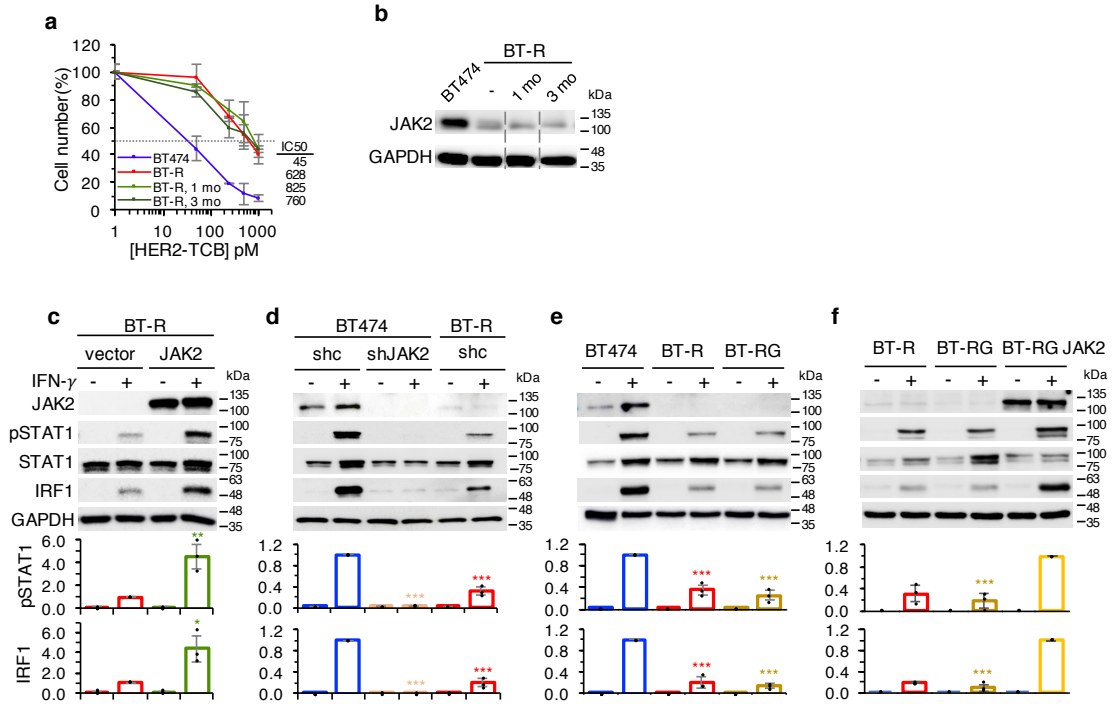

**a**, Co-cultures of PBMCs with parental BT474 or resistant BT-R cells kept under selective pressure or cultured in normal medium during 1 or 3 months were treated with different concentrations of HER2-TCB for 72 h. Then, viable cells were quantified by flow cytometry using EpCAM as a marker.

**b**, Levels of JAK2 as determined by Western blot on the same cells as in **a**.

**c-f**, Western blot analysis of the expression of components of the IFN- $\gamma$  intracellular signaling pathway components.

(**c**) \*\* $p=0.009$ , \* $p=0.02$ . (**d**, **e**, **f**) \*\*\* $p<0.001$ , two-tailed t test. Data are presented as mean  $\pm$  SD of two (**a**) or three (**c**, **d**, **e**, **f**) independent experiments. Source data are provided as a Source Data file.

**Supplementary Fig. 6: Generation of additional models of resistance to HER2-TCB in vivo.**

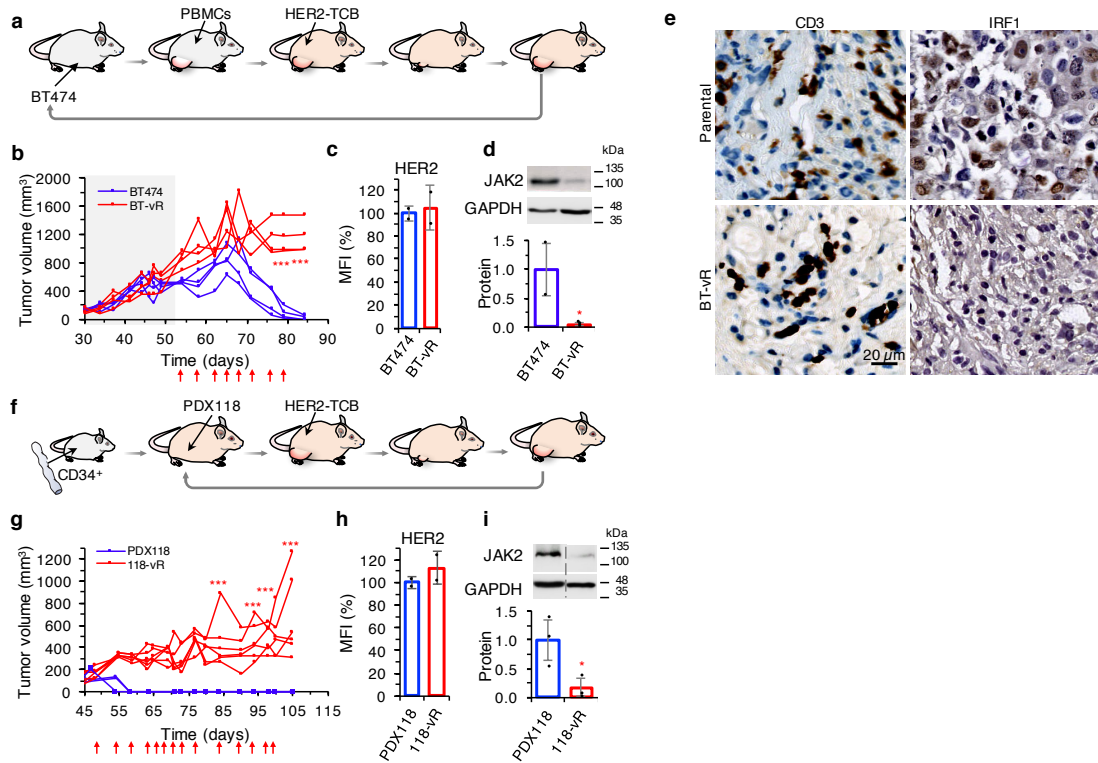

**a**, Schematic showing the generation of additional models.  $10^7$  BT474 cells were injected orthotopically into NSG mice. When tumors reached  $\sim 200$  mm<sup>3</sup>,  $10^7$  PBMCs were injected i.p. Then animals were treated i.v. with an increasing concentration of HER2-TCB. Tumors were allowed to regrow, excised, and injected again into NSG mice.

**b**, Mice were injected with  $10^7$  BT474 or BT-vR cells and treated with 0.25 mg/kg HER2-TCB. Treatments are indicated by red arrows. Tumor volumes of individual mice are represented (n=4 per group).

**c**, Cells were stained with anti-HER2 and analyzed by flow cytometry. Quantitative data, normalized to BT474, corresponds to averages  $\pm$  SD of two determinations.

**d**, Levels of JAK2 as determined by Western blot. Quantitative data, normalized to BT474, corresponds to averages  $\pm$  SD of two different parental and four different resistant tumor determinations.

**e**, Representative immunohistochemical staining of hCD3 and hIRF1 in tumor sections. Images are representative of all tumors in **b**.

**f**, Schematic showing the generation of additional models. PDX118 was grafted in mice humanized with CD34<sup>+</sup> cells. When tumors reached  $\sim 200$  mm<sup>3</sup>, animals were treated i.v. with an increasing concentration of HER2-TCB. Tumors were allowed to regrow and treatment was repeated.

**g**, Mice humanized with CD34<sup>+</sup> cells were grafted with PDX118, or 118-vR tumors. Mice were treated i.v. with 0.25 mg/kg HER2-TCB. Tumor volumes of individual mice are represented (PDX118, n=3; 118-vR, n=6).

**h, i**, Levels of HER2 or JAK2 were determined as in **c, d**. Quantitative data corresponds to averages  $\pm$  SD of two (**h**) and three (**i**) determinations.

**(d)** \*p=0.02. **(i)** \*p=0.04, two-tailed t test. **(b and g)** \*\*\*p<0.001, two-way ANOVA and Bonferroni correction. Source data are provided as a Source Data file.

**Supplementary Fig. 7: Models of resistance to IFN- $\gamma$  are also resistant to HER2-TCB because of JAK2 downmodulation.**

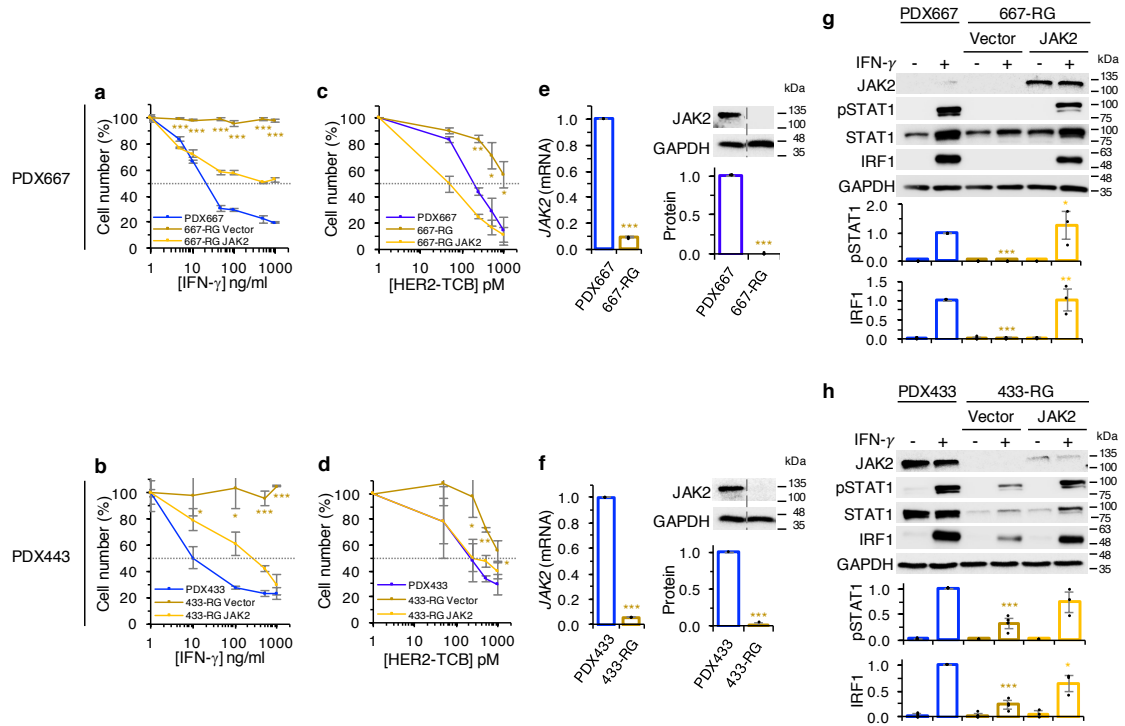

**a, b**, The indicated cells were treated with different concentrations of IFN- $\gamma$  for 5 days. Cell numbers were estimated with the crystal violet staining assay.

**c, d**, Co-cultures of the indicated cells were treated with different concentrations of HER2-TCB for 72 h. Then, viable cells were quantified by flow cytometry using EpCAM as a marker.

**e, f**, The levels of JAK2 (mRNA and protein) as determined by quantitative real-time PCR (left) or Western blot (right). Results were normalized to parental cells.

**g, h**, Western blot analysis of the expression of components of the IFN- $\gamma$  intracellular signaling pathway components. Results were normalized to treated parental cells.

(**a**) \*\*\* $p < 0.001$ . (**c**) \*\* $p = 0.004$ , \* $p = 0.012$ ,  $p^* = 0.02$ . (**e**) \*\*\* $p < 0.001$ . (**g**) \* $p = 0.02$ , \*\* $p = 0.008$ , \*\*\* $p < 0.001$ . (**b**) \* $p = 0.018$ , \* $p = 0.014$ , \*\*\* $p < 0.001$ . (**d**) \* $p = 0.02$ , \*\* $p = 0.002$ , \* $p = 0.013$ . (**f**) \*\*\* $p < 0.001$ . (**h**) \* $p = 0.04$ , \*\*\* $p < 0.001$ , two-tailed t test. Data are presented as mean  $\pm$  SD of three independent experiments. Source data are provided as a Source Data file.

**Supplementary Fig. 8: Gating strategies used for functional assays, protein expression and cell sorting.**

**Gating strategy I**

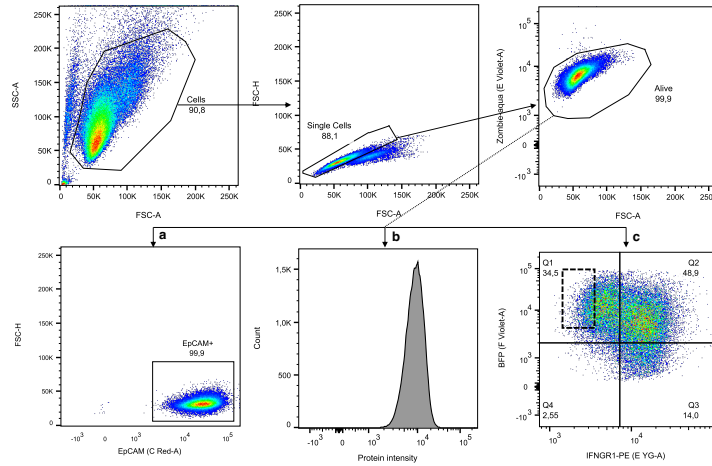

**Gating strategy II**

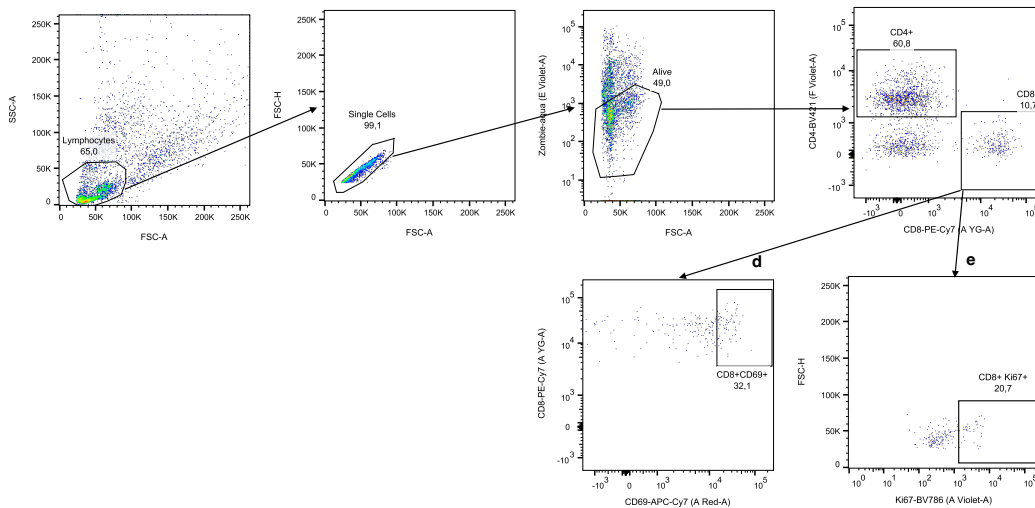

**a**, Gating strategy to obtain EpCAM<sup>+</sup> cell counts in functional T cell cytotoxicity assays presented on Fig. 1b,1f, Fig. 3a, b,g,h, Fig. 5b,c,g,h, Fig. 6b,c,g,h, Supplementary Fig. 1b,c, Supplementary Fig. 2d, Supplementary Fig. 3c,d, Supplementary Fig. 4a-c,g-k, Supplementary Fig. 5a, Supplementary Fig 7c,d.

**b**, Gating strategy to measure MFI for a particular surface protein: HER2 (presented on Supplementary Fig. 1d, Supplementary Fig. 6c,h), HER2-TCB binding (presented on Fig 1j), IFNGR1 (presented on Fig. 3e, Fig. 4c, Supplementary Fig. 4d-f,j,k), IFNGR2 (presented on Fig. 4c), PDL1, PDL2, CD80, CD86, Galectin-9, B7-H3, B7-H4, HVEM, ICOS-L, 41BB-L, OX40-L (presented on Fig. 1k). Same strategy was used for Annexin V<sup>+</sup> analysis presented on Fig. 3d, but in this case the viability marker used was PI.

**c**, Gating strategy to sort BFP<sup>high</sup>/IFNGR1 (square dashes) negative expressing cells from BT474 cells expressing Cas9 and a CRISPR gRNA targeting IFNGR1, used for in vitro cytotoxic assays (presented on Fig. 3f-h) and in vivo (presented on Fig. 3i).

**d, e**, Gating strategy to obtain the % of CD69<sup>+</sup> (d) and Ki67<sup>+</sup> cells (e) from CD8<sup>+</sup> cells used in functional in vitro T cell cytotoxicity assays, presented on Supplementary Fig. 2f and g.
