# Supplementary material for: Acquired cancer cell resistance to T cell bispecific antibodies and CAR T targeting HER2 through JAK2 down-modulation
Source: PubMed Central journal article supplement (PMC7902842; doi:10.1038/s41467-021-21445-4), 2021-02-23
Supplement: 41467_2021_21445_MOESM3_ESM.pdf [file 41467_2021_21445_MOESM3_ESM.pdf]

## Reporting Summary

Nature Research wishes to improve the reproducibility of the work that we publish. This form provides structure for consistency and transparency in reporting. For further information on Nature Research policies, see our [Editorial Policies](#) and the [Editorial Policy Checklist](#).

### Statistics

For all statistical analyses, confirm that the following items are present in the figure legend, table legend, main text, or Methods section.

n/a Confirmed

- |                                     |                                     |                                                                                                                                                                                                                                                            |
|-------------------------------------|-------------------------------------|------------------------------------------------------------------------------------------------------------------------------------------------------------------------------------------------------------------------------------------------------------|
| <input type="checkbox"/>            | <input checked="" type="checkbox"/> | The exact sample size ( $n$ ) for each experimental group/condition, given as a discrete number and unit of measurement                                                                                                                                    |
| <input type="checkbox"/>            | <input checked="" type="checkbox"/> | A statement on whether measurements were taken from distinct samples or whether the same sample was measured repeatedly                                                                                                                                    |
| <input type="checkbox"/>            | <input checked="" type="checkbox"/> | The statistical test(s) used AND whether they are one- or two-sided<br><i>Only common tests should be described solely by name; describe more complex techniques in the Methods section.</i>                                                               |
| <input checked="" type="checkbox"/> | <input type="checkbox"/>            | A description of all covariates tested                                                                                                                                                                                                                     |
| <input checked="" type="checkbox"/> | <input type="checkbox"/>            | A description of any assumptions or corrections, such as tests of normality and adjustment for multiple comparisons                                                                                                                                        |
| <input type="checkbox"/>            | <input checked="" type="checkbox"/> | A full description of the statistical parameters including central tendency (e.g. means) or other basic estimates (e.g. regression coefficient) AND variation (e.g. standard deviation) or associated estimates of uncertainty (e.g. confidence intervals) |
| <input type="checkbox"/>            | <input checked="" type="checkbox"/> | For null hypothesis testing, the test statistic (e.g. $F$ , $t$ , $r$ ) with confidence intervals, effect sizes, degrees of freedom and $P$ value noted<br><i>Give <math>P</math> values as exact values whenever suitable.</i>                            |
| <input checked="" type="checkbox"/> | <input type="checkbox"/>            | For Bayesian analysis, information on the choice of priors and Markov chain Monte Carlo settings                                                                                                                                                           |
| <input checked="" type="checkbox"/> | <input type="checkbox"/>            | For hierarchical and complex designs, identification of the appropriate level for tests and full reporting of outcomes                                                                                                                                     |
| <input checked="" type="checkbox"/> | <input type="checkbox"/>            | Estimates of effect sizes (e.g. Cohen's $d$ , Pearson's $r$ ), indicating how they were calculated                                                                                                                                                         |

*Our web collection on [statistics for biologists](#) contains articles on many of the points above.*

### Software and code

Policy information about [availability of computer code](#)

Data collection BD FACSDiva v 6.1.2 software, SDS 2.4 software

Data analysis FlowJo v10 software, NDP.view2.7 software, Fiji v1.48p, ImageJ v1.49b, R.Q.manager v1.2 software, DataAssist v3.01 software, software Real Time Analysis (RTA v2.7.7), STAR/2.5.3a, RSEM/1.3.0, GEMtools v1.7.0, DESeq2/1.18, fgsea R package v1.16.0, pheatmap R package v1.0.12, GSEAPreranked v6.0.12, R v3.6.3 software, GraphPad Prism v6.0c.

For manuscripts utilizing custom algorithms or software that are central to the research but not yet described in published literature, software must be made available to editors and reviewers. We strongly encourage code deposition in a community repository (e.g. GitHub). See the Nature Research [guidelines for submitting code & software](#) for further information.

### Data

Policy information about [availability of data](#)

All manuscripts must include a [data availability statement](#). This statement should provide the following information, where applicable:

- Accession codes, unique identifiers, or web links for publicly available datasets
- A list of figures that have associated raw data
- A description of any restrictions on data availability

RNAseq data that support the findings of the study have been deposited in Sequence Read Archive (SRA) and are accessible through the SRA Bioproject accession number PRJNA674313 (<https://www.ncbi.nlm.nih.gov/bioproject/?term=PRJNA674313>). All other relevant data are available from the corresponding author on request.

## Field-specific reporting

Please select the one below that is the best fit for your research. If you are not sure, read the appropriate sections before making your selection.

Life sciences  Behavioural & social sciences  Ecological, evolutionary & environmental sciences

For a reference copy of the document with all sections, see [nature.com/documents/nr-reporting-summary-flat.pdf](https://www.nature.com/documents/nr-reporting-summary-flat.pdf)

## Life sciences study design

All studies must disclose on these points even when the disclosure is negative.

|                 |                                                                                                                                                                                                                                                                                                                                                                                                                                                                                                                                                           |
|-----------------|-----------------------------------------------------------------------------------------------------------------------------------------------------------------------------------------------------------------------------------------------------------------------------------------------------------------------------------------------------------------------------------------------------------------------------------------------------------------------------------------------------------------------------------------------------------|
| Sample size     | An assessment of the number of animals required for each procedure was performed using Statistical Power Analysis and taking into consideration the appropriate statistical tests, significance level of 5% and statistical power of 80%. An estimate of variance was inferred from previous experiments, especially considering the variability of tumor xenograft growth.<br>For in vitro experiments, two to four biological replicates were performed, which was sufficient to show data reproducibility. No sample-size calculations were performed. |
| Data exclusions | Animals were excluded from the study if presented graft vs host disease. Criteria was pre-established and animals were excluded from all humanized PBMCs experiments.                                                                                                                                                                                                                                                                                                                                                                                     |
| Replication     | Experimental findings were reliably reproduced. Experiments were performed at least three times unless otherwise noted in the manuscript.                                                                                                                                                                                                                                                                                                                                                                                                                 |
| Randomization   | Animals, upon arrival, were randomly allocated into cages with five mice each. The mice were randomly assigned to experimental groups. No specific method of randomization was used.<br>For in vitro experiments, randomization was not needed, since samples were not divided into groups.                                                                                                                                                                                                                                                               |
| Blinding        | Experiments were performed in a blinded fashion.                                                                                                                                                                                                                                                                                                                                                                                                                                                                                                          |

## Reporting for specific materials, systems and methods

We require information from authors about some types of materials, experimental systems and methods used in many studies. Here, indicate whether each material, system or method listed is relevant to your study. If you are not sure if a list item applies to your research, read the appropriate section before selecting a response.

### Materials & experimental systems

| n/a                                 | Involved in the study                                           |
|-------------------------------------|-----------------------------------------------------------------|
| <input type="checkbox"/>            | <input checked="" type="checkbox"/> Antibodies                  |
| <input type="checkbox"/>            | <input checked="" type="checkbox"/> Eukaryotic cell lines       |
| <input checked="" type="checkbox"/> | <input type="checkbox"/> Palaeontology and archaeology          |
| <input type="checkbox"/>            | <input checked="" type="checkbox"/> Animals and other organisms |
| <input type="checkbox"/>            | <input checked="" type="checkbox"/> Human research participants |
| <input checked="" type="checkbox"/> | <input type="checkbox"/> Clinical data                          |
| <input checked="" type="checkbox"/> | <input type="checkbox"/> Dual use research of concern           |

### Methods

| n/a                                 | Involved in the study                              |
|-------------------------------------|----------------------------------------------------|
| <input checked="" type="checkbox"/> | <input type="checkbox"/> ChIP-seq                  |
| <input type="checkbox"/>            | <input checked="" type="checkbox"/> Flow cytometry |
| <input checked="" type="checkbox"/> | <input type="checkbox"/> MRI-based neuroimaging    |

## Antibodies

### Antibodies used

Anti-Human HER2 (clone CB11) BioGenex Cat# AM134  
 Anti-Human JAK1 (clone 6G4) Cell Signaling Technology Cat# 3344, RRID: AB\_2265054  
 Anti-Human JAK2 (clone D2E12) Cell Signaling Technology Cat# 3230, RRID: AB\_2128522  
 Anti-Human p-STAT1 (Tyr701) (clone 58D6) Cell Signaling Technology Cat# 9167, RRID:AB\_561284  
 Anti-Human STAT1 Cell Signaling Technology Cat# 9172, RRID:AB\_2198300  
 Anti-Human IRF1 (C-20) Santa Cruz Biotechnology Cat# sc-497, RRID:AB\_631838  
 Anti-Human GAPDH [EPR6256] Abcam Cat# ab128915, RRID:AB\_11143050  
 Sheep Anti-Mouse IgG - Horseradish Peroxidase antibody GE Healthcare Cat# NA931, RRID:AB\_772210  
 Donkey Anti-Rabbit IgG - Horseradish Peroxidase antibody GE Healthcare Cat# NA934, RRID:AB\_772206  
 Anti-Human IRF1 Atlas Antibodies/Sigma-Aldrich Cat# HPA063131, RRID:AB\_2684945  
 EnVision+ System- HRP Labelled Polymer Anti-Rabbit Dako/Agilent Cat# K4003, RRID:AB\_2630375  
 Anti-Human CD3 (clone 2GV6) Ventana Medical Systems Cat# 790-4341, RRID:AB\_2335978  
 Trastuzumab (Herceptin) Roche  
 Goat anti-Human IgG (H+L) Cross-Adsorbed Secondary Antibody, Alexa Fluor 488 Invitrogen Cat# A-11013, RRID:AB\_2534080  
 Anti-Human PD-L1 (clone 29E.2A3) Biolegend Cat# 329736, RRID:AB\_2629582  
 Anti-Human PD-L2 (clone MIH18) Miltenyi Biotec Cat# 130-098-525, RRID:AB\_2656873

Anti-Biotin PE-Vio770 Miltenyi Biotec Cat# 130-113-292, RRID:AB\_2726074  
 Anti-Human CD80 (clone 2D10) Biolegend Cat# 305221, RRID:AB\_10899567  
 Anti-Human CD86 (clone IT2.2) Biolegend Cat# 305425, RRID:AB\_10899582  
 Anti-Human Galectin-9 (clone 9M1-3) Biolegend Cat# 348905, RRID:AB\_10613284  
 Anti-Human CD276 (B7-H3) (clone MIH42) Biolegend Cat# 351003, RRID:AB\_10719959  
 Anti-Human B7-H4 (clone MIH43) Biolegend Cat# 358103, RRID:AB\_2562080  
 Anti-Human CD270 (HVEM) (clone 122) Biolegend Cat# 318805, RRID:AB\_2203704  
 Anti-Human CD275 (ICOS-L) (clone 2D3) Biolegend Cat# 309403, RRID:AB\_314769  
 Anti-Human CD137L (41BB-L) (clone 5F4) Biolegend Cat# 311503, RRID:AB\_314882  
 Anti-Human CD252 (OX40-L) (clone 11C3.1) Biolegend Cat# 326307, RRID:AB\_2207272  
 Anti-Human CD119 (IFN-gamma R alpha chain) (clone GIR-208) Biolegend Cat# 308606, RRID:AB\_314726  
 Anti-Human IFN-gamma R  $\beta$  chain (clone 2HUB-159) Biolegend Cat# 308504, RRID:AB\_314718  
 Anti-Human CD326 (EpCAM) (clone 9C4) Biolegend Cat# 324212, RRID:AB\_756086  
 Anti-human CD34 (clone 581) StemCell Technologies Cat# 60013, RRID:AB\_2783003  
 Anti-Human CD45 (clone HI30) Biolegend Cat# 304008, RRID:AB\_314396  
 Anti-Human CD3 Biolegend Cat# 300408, RRID:AB\_314062  
 CD3 Monoclonal Antibody (Clone OKT3) Thermo-Fisher Cat# 16-0037-85, RRID:AB\_468855  
 LEAF Purified anti-human IFN gamma antibody Biolegend Cat# 506512, RRID:AB\_315445  
 LEAF purified IgG1 mouse control Biolegend Cat# 400123  
 Anti-Ki-67 (clone B5) BD Biosciences Cat# 563756, RRID:AB\_2732007  
 Anti-Human CD8 (Clone SK1) Biolegend Cat# 344712, RRID:AB\_2044008  
 Anti-Human CD69 (clone FN50) Biolegend Cat# 310914, RRID:AB\_314849  
 PE Mouse IgG1,  $\kappa$  Isotype Ctrl (Clone MOPC-21) Biolegend Cat# 400114  
 Rabbit IgG Sigma-Aldrich Cat# I8140, RRID:AB\_1163661  
 Anti-H3K27Me3 Millipore Cat# 07-449, RRID:AB\_310624  
 Anti-H3K27Ac Abcam Cat# ab4729, RRID:AB\_2118291

## Validation

All antibodies used in this study were validated by the manufacturers for specific detection of the antigen and species reactivity.  
 Anti-Human HER2 was validated by IHC staining of human breast carcinoma tissue FFPE.  
 All CST primary antibodies were validated for WB in human samples.  
 Anti-Human IRF1 (SC) has been validated for WB in human samples in several publications such as PMID #8626684 and PMID #17148586.  
 Anti-Human GAPDH was validated for WB in human samples.  
 Anti-Human IRF1 (Atlas Antibodies/Sigma-Aldrich) was validated for IHC in human samples.  
 Anti-Human CD3 (Ventana) was validated for IHC in human samples.  
 All Biolegend primary antibodies were validated for FC in human samples.  
 Anti-Human PD-L2 was validated for FC in human samples.  
 Anti-human CD34 was validated for FC in human samples.  
 CD3 Monoclonal Antibody (Clone OKT3) was validated for FC in human samples.  
 Anti-Ki-67 was validated for FC in human samples.  
 Anti-H3K27Me3 was validated by WB in human samples.  
 Anti-H3K27Ac was validated for ChIP in human samples.

## Eukaryotic cell lines

### Policy information about [cell lines](#)

## Cell line source(s)

BT474 (#HTB-20), SKBR3 (#HTB-30), HEK293T (#CRL-11268), SKOV3 (#HTB-77) and H1781 (#CRL-5894) were obtained from ATCC (Manassas, VA, USA). GP2-293 cells (#631458) were obtained from Clontech. PDX433, PDX667, and PDX118 come from patient samples from Vall d'Hebron Hospital and have been established at VHIO following institutional guidelines.

## Authentication

Cell lines were purchased with the certificate from the vendor. Cell lines were not authenticated in-house. Patient samples were characterized in Vall d'Hebron Hospital for the presence of ER and HER2 by IHC.

## Mycoplasma contamination

Cell lines were tested for mycoplasma and only mycoplasma-negative cell lines were used.

Commonly misidentified lines  
(See [ICLAC](#) register)

None of the cell lines used in this study was found in the database of commonly misidentified cell lines that are maintained by ICLAC.

## Animals and other organisms

### Policy information about [studies involving animals](#); [ARRIVE guidelines](#) recommended for reporting animal research

## Laboratory animals

Mice, NOD.Cg-Prkdcscid Il2rgtm1Wjl/SzJ (NSG), female, 5 to 7 weeks of age. All mice in this study were kept within Home Office limits of 22°C  $\pm$  2°C, 55 – 65% humidity and run on a 12 h light/dark cycle that runs from 8am to 8pm.

|                         |                                                                                                                                                                    |
|-------------------------|--------------------------------------------------------------------------------------------------------------------------------------------------------------------|
| Wild animals            | This study did not involve wild animals.                                                                                                                           |
| Field-collected samples | This study did not involve samples collected from the field.                                                                                                       |
| Ethics oversight        | Animal work was performed according to protocols approved by the Ethical Committee for the Use of Experimental Animals at the Vall d'Hebron Institute of Oncology. |

Note that full information on the approval of the study protocol must also be provided in the manuscript.

## Human research participants

Policy information about [studies involving human research participants](#)

|                            |                                                                                                                                                                                                                                           |
|----------------------------|-------------------------------------------------------------------------------------------------------------------------------------------------------------------------------------------------------------------------------------------|
| Population characteristics | Patient derived xenografts were obtained from HER2+ breast cancer patients. PBMCs were obtained from healthy donors.                                                                                                                      |
| Recruitment                | Patient derived xenografts were obtained from HER2+ breast cancer patients from Vall d'Hebron Hospital. PBMCs were obtained through the Blood and Tissue Bank of Catalonia (BST) from healthy donors.                                     |
| Ethics oversight           | All human samples were obtained with informed consent and following institutional guidelines under protocols approved by the institutional review boards (IRBs) at Vall d'Hebron Hospital in accordance with the declaration of Helsinki. |

Note that full information on the approval of the study protocol must also be provided in the manuscript.

## Flow Cytometry

### Plots

Confirm that:

- The axis labels state the marker and fluorochrome used (e.g. CD4-FITC).
- The axis scales are clearly visible. Include numbers along axes only for bottom left plot of group (a 'group' is an analysis of identical markers).
- All plots are contour plots with outliers or pseudocolor plots.
- A numerical value for number of cells or percentage (with statistics) is provided.

### Methodology

|                           |                                                                                                                                                                                                                                                                                                                                                                                                                                                                                                                                                                                                                                                                                                                                                                                                                                                                                                                                                                                                                                                                  |
|---------------------------|------------------------------------------------------------------------------------------------------------------------------------------------------------------------------------------------------------------------------------------------------------------------------------------------------------------------------------------------------------------------------------------------------------------------------------------------------------------------------------------------------------------------------------------------------------------------------------------------------------------------------------------------------------------------------------------------------------------------------------------------------------------------------------------------------------------------------------------------------------------------------------------------------------------------------------------------------------------------------------------------------------------------------------------------------------------|
| Sample preparation        | Cultured cells were collected by trypsinization. Cells from tumor samples were purified using a physical and enzymatic protocol. Briefly, tumours were digested in 300 U/ml collagenase IA and 100 U/ml Hialuronidase IS in DMEM F-12 medium. After 1 hour of incubation at 37°C with shaking at 80 rpm, the mixture was filtered through 100-micromter strainers. Red blood cells were lysed with 1x Red Blood Cell lysis buffer for 5 min RT. After a wash with 1x PBS, samples were acquired on LSR Fortessa.                                                                                                                                                                                                                                                                                                                                                                                                                                                                                                                                                 |
| Instrument                | For cell sorting: BD FACSAria 1.0<br>For flow cytometry analysis: BD LSRFortessa                                                                                                                                                                                                                                                                                                                                                                                                                                                                                                                                                                                                                                                                                                                                                                                                                                                                                                                                                                                 |
| Software                  | For data collection: BD FACSDiva v 6.1.2 software<br>For data analysis: FlowJo v 10                                                                                                                                                                                                                                                                                                                                                                                                                                                                                                                                                                                                                                                                                                                                                                                                                                                                                                                                                                              |
| Cell population abundance | More than 99% of the population was negative for IFNGR1 after sorting the BT474 KO IFNGR1 cell line. Validation was done by IFNGR1 staining.                                                                                                                                                                                                                                                                                                                                                                                                                                                                                                                                                                                                                                                                                                                                                                                                                                                                                                                     |
| Gating strategy           | After cells were selected in the FSC/SSC dot plot to remove debris, they were gated to exclude cellular aggregates in the FSC/FSC dot plot. To obtain EpCAM+ counts in functional T-cell cytotoxicity assays and surface marker expression, Zombie Aqua negative cells were further analyzed with the following antibodies: HER2, binding HER2-TCB, IFNGR1, IFNGR2, PDL1, PDL2, CD80, CD86, Galectin-9, B7-H3, B7-H4, HVEM, ICOS-L, 41BB-L, OX40-L. Same strategy was used for Annexin V+ analysis, but in this case the viability marker used was PI. Same gating strategy was used to sort BFPhigh/IFNGR1 negative expressing cells from BT474 cells expressing Cas9 and a CRISPR gRNA targeting IFNGR1.<br><br>In the case of obtaining the % of CD69+ and Ki67+ in CD8+, cells were selected in the FSC/SSC dot plot to remove debris and they were gated to exclude cellular aggregates in the FSC/FSC dot plot. Then, Zombie Aqua negative cells were gated using the CD4 and CD8 antibodies. Finally, CD8+ cells were gated for CD69 and Ki67 positivity. |

- Tick this box to confirm that a figure exemplifying the gating strategy is provided in the Supplementary Information.
